# Supplementary material for: Enhancement of Electrochemical Performance for Sodium-Ion Batteries by Eu-doped Na12(NbO)3(PO4)7 Anode Material
Source: Research Square preprint supplement (doi:10.21203/rs.3.rs-7600500/v1), 2025-10-27
Supplement: Supplementary file 1 [file 72aa74e49fd8c63c312c72af.docx]

**Supplementary information**

**Enhancement of Electrochemical Performance for Sodium-Ion Batteries by Eu-doped** **Na12(NbO)3(PO4)7 Anode Material**

Xue Zhang1 • Qiankun Li1 • Yuandong Wu1 • Yu Zhang2 • Hua Zhang3

🖂 Yuandong Wu: [wuyuandong@sues.edu.cn](mailto:wuyuandong@sues.edu.cn)

1 College of Chemistry and Chemical Engineering, Shanghai University of Engineering Science, Longteng Road 333, Shanghai 201620, People’s Republic of China

2 The Third Affiliated Hospital of Henan Medical University, Henan Medical University, Jinsui Avenue 601, Henan 453003, People’s Republic of China

3 School of Chemical and Material Engineering, Hainan Vocational University of Science and Technology, Qiongshan Avenue 18, Hainan 571126, People’s Republic of China


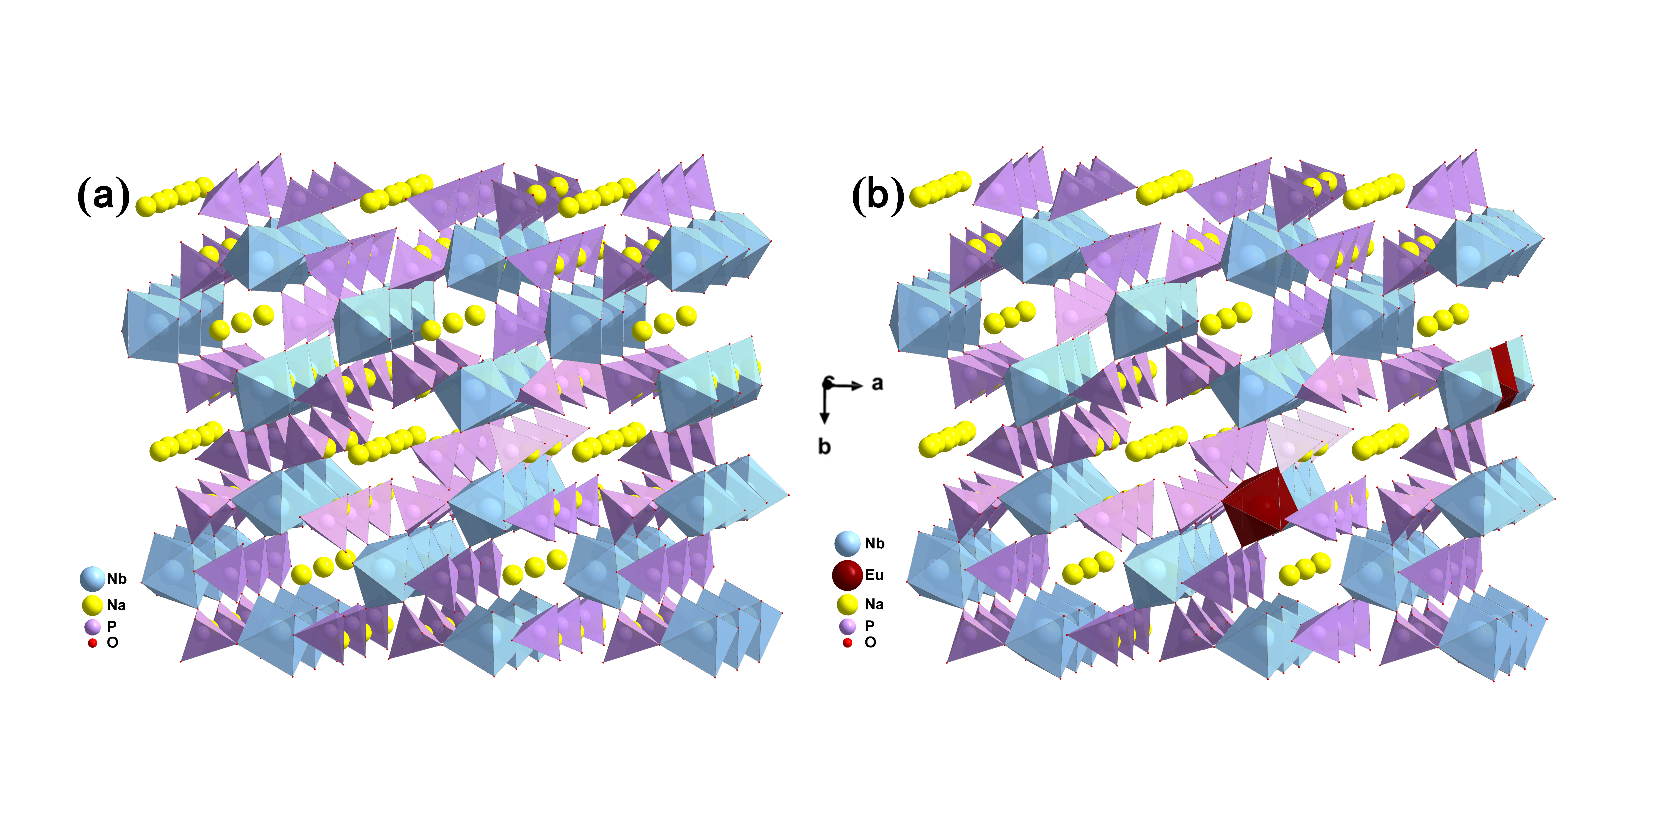


**Figure S1.** The crystal structures of Na12 (**a**) and Eu-0.06 (**b**).


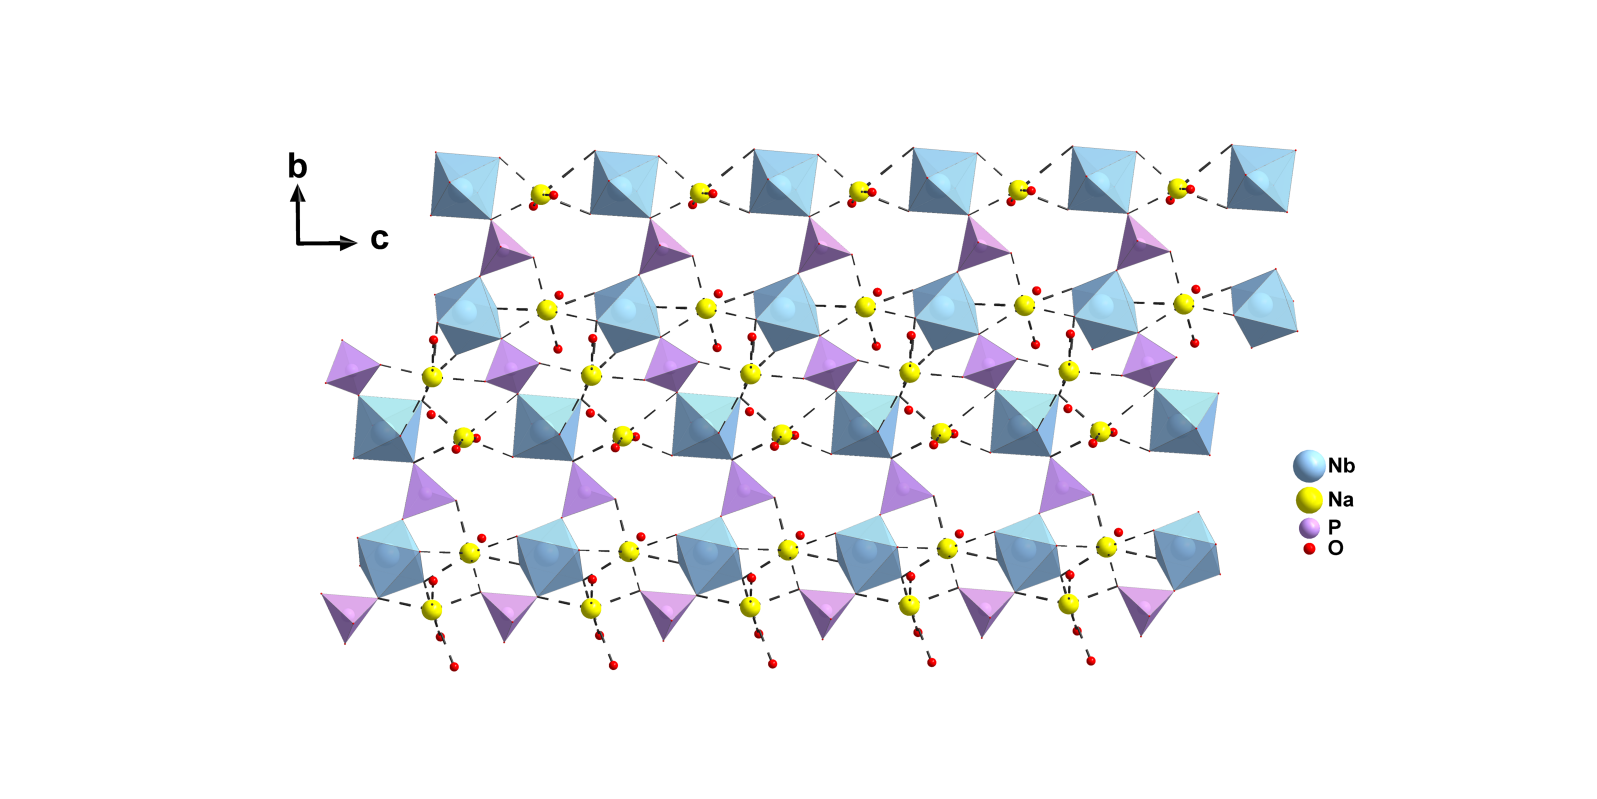


**Figure S2.** The structure in the a-direction.


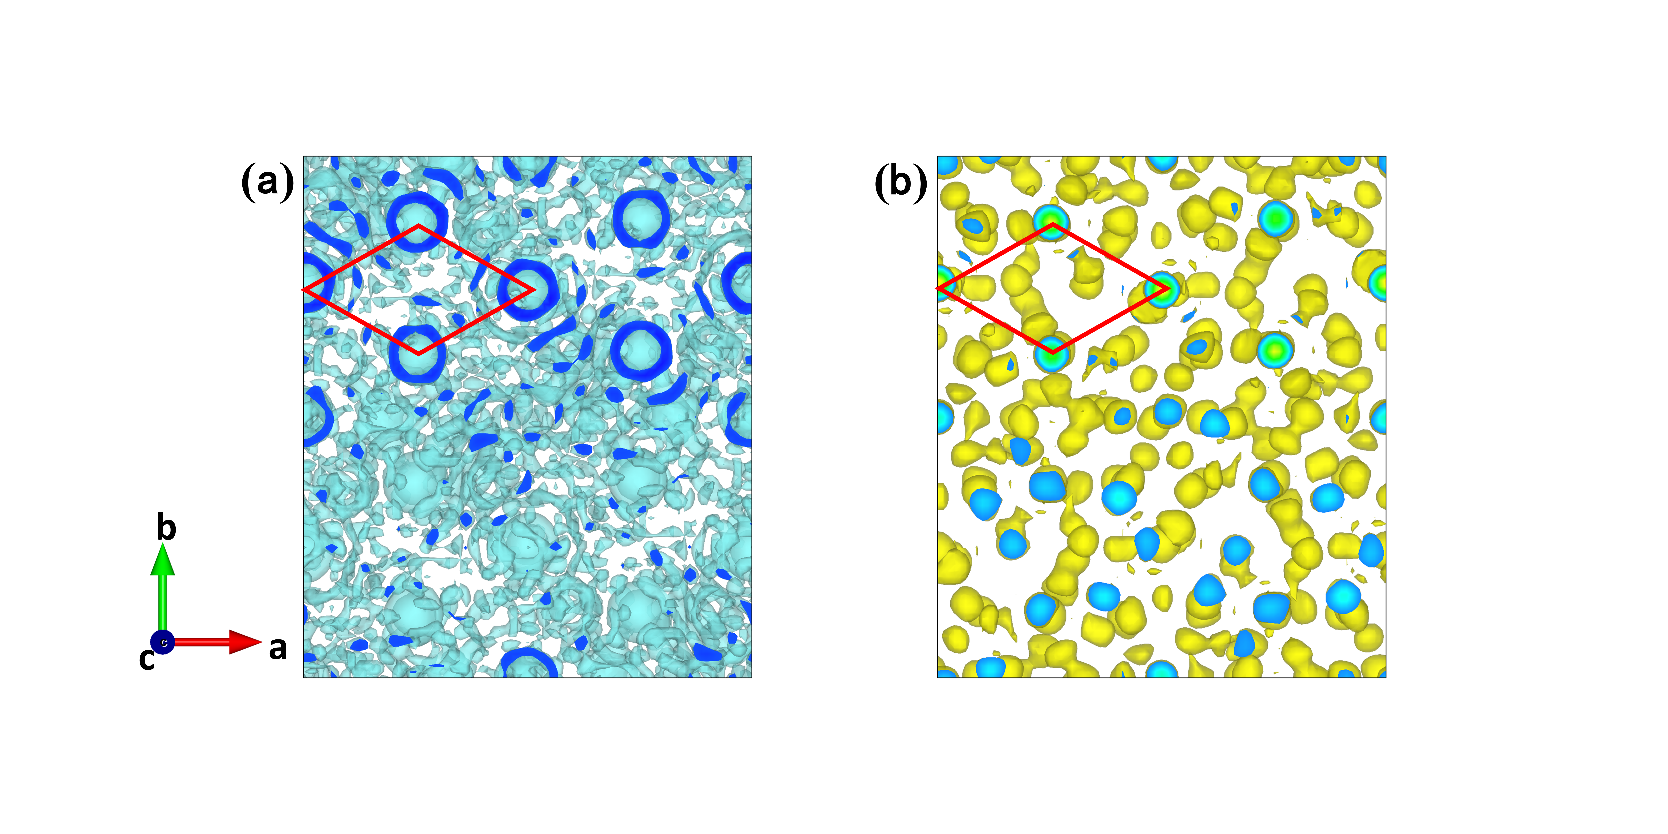


**Figure S3.** **a** Negative Electron Density Map; **b** Positive Electron Density Map.


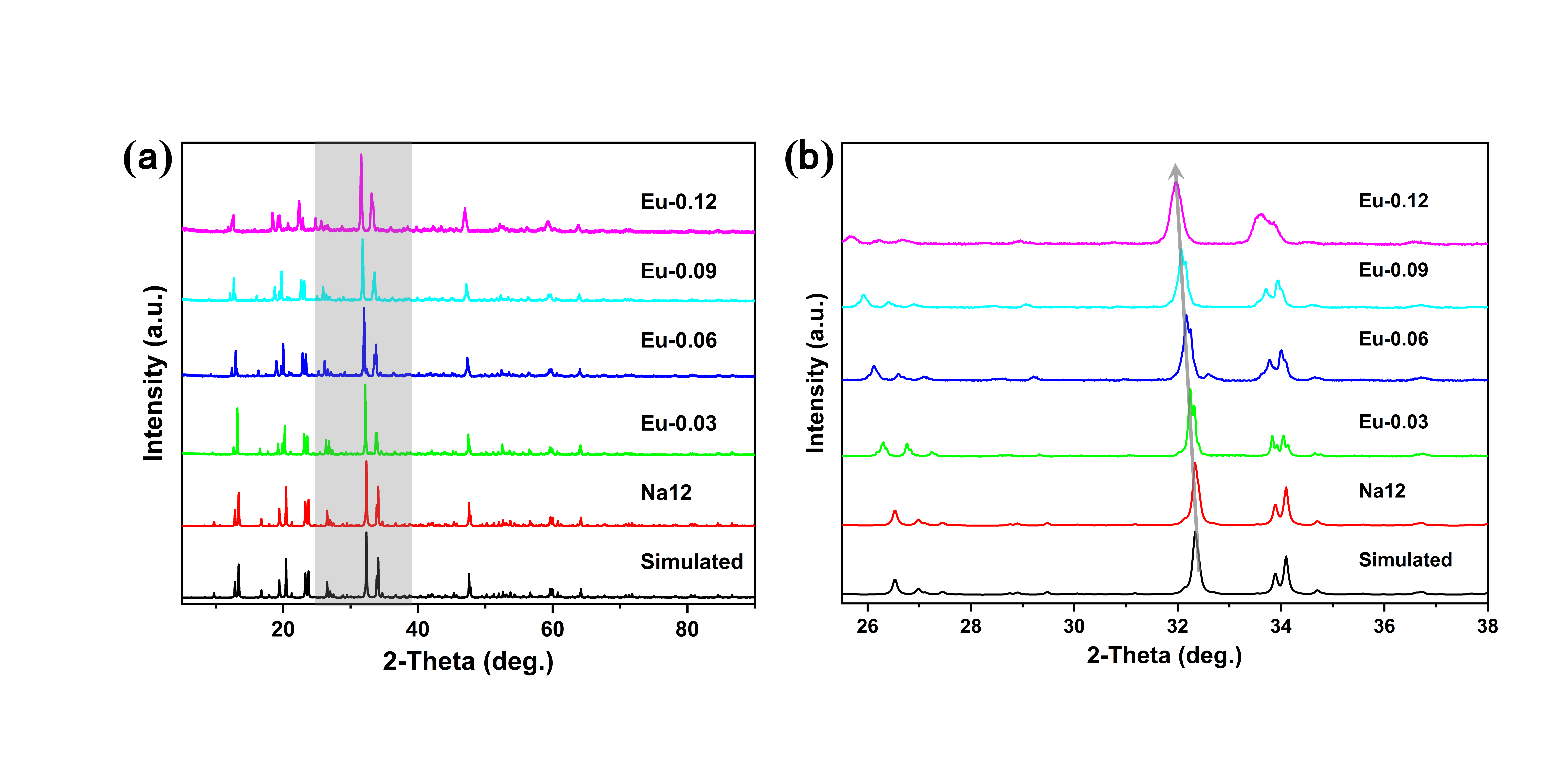


**Figure S4. a, b** XRD patterns and homologous enlarged regions of the Na12(NbO)(3-*x*)Eu*x*(PO4)7 with varied Eu doping contents from 0 to 0.12.


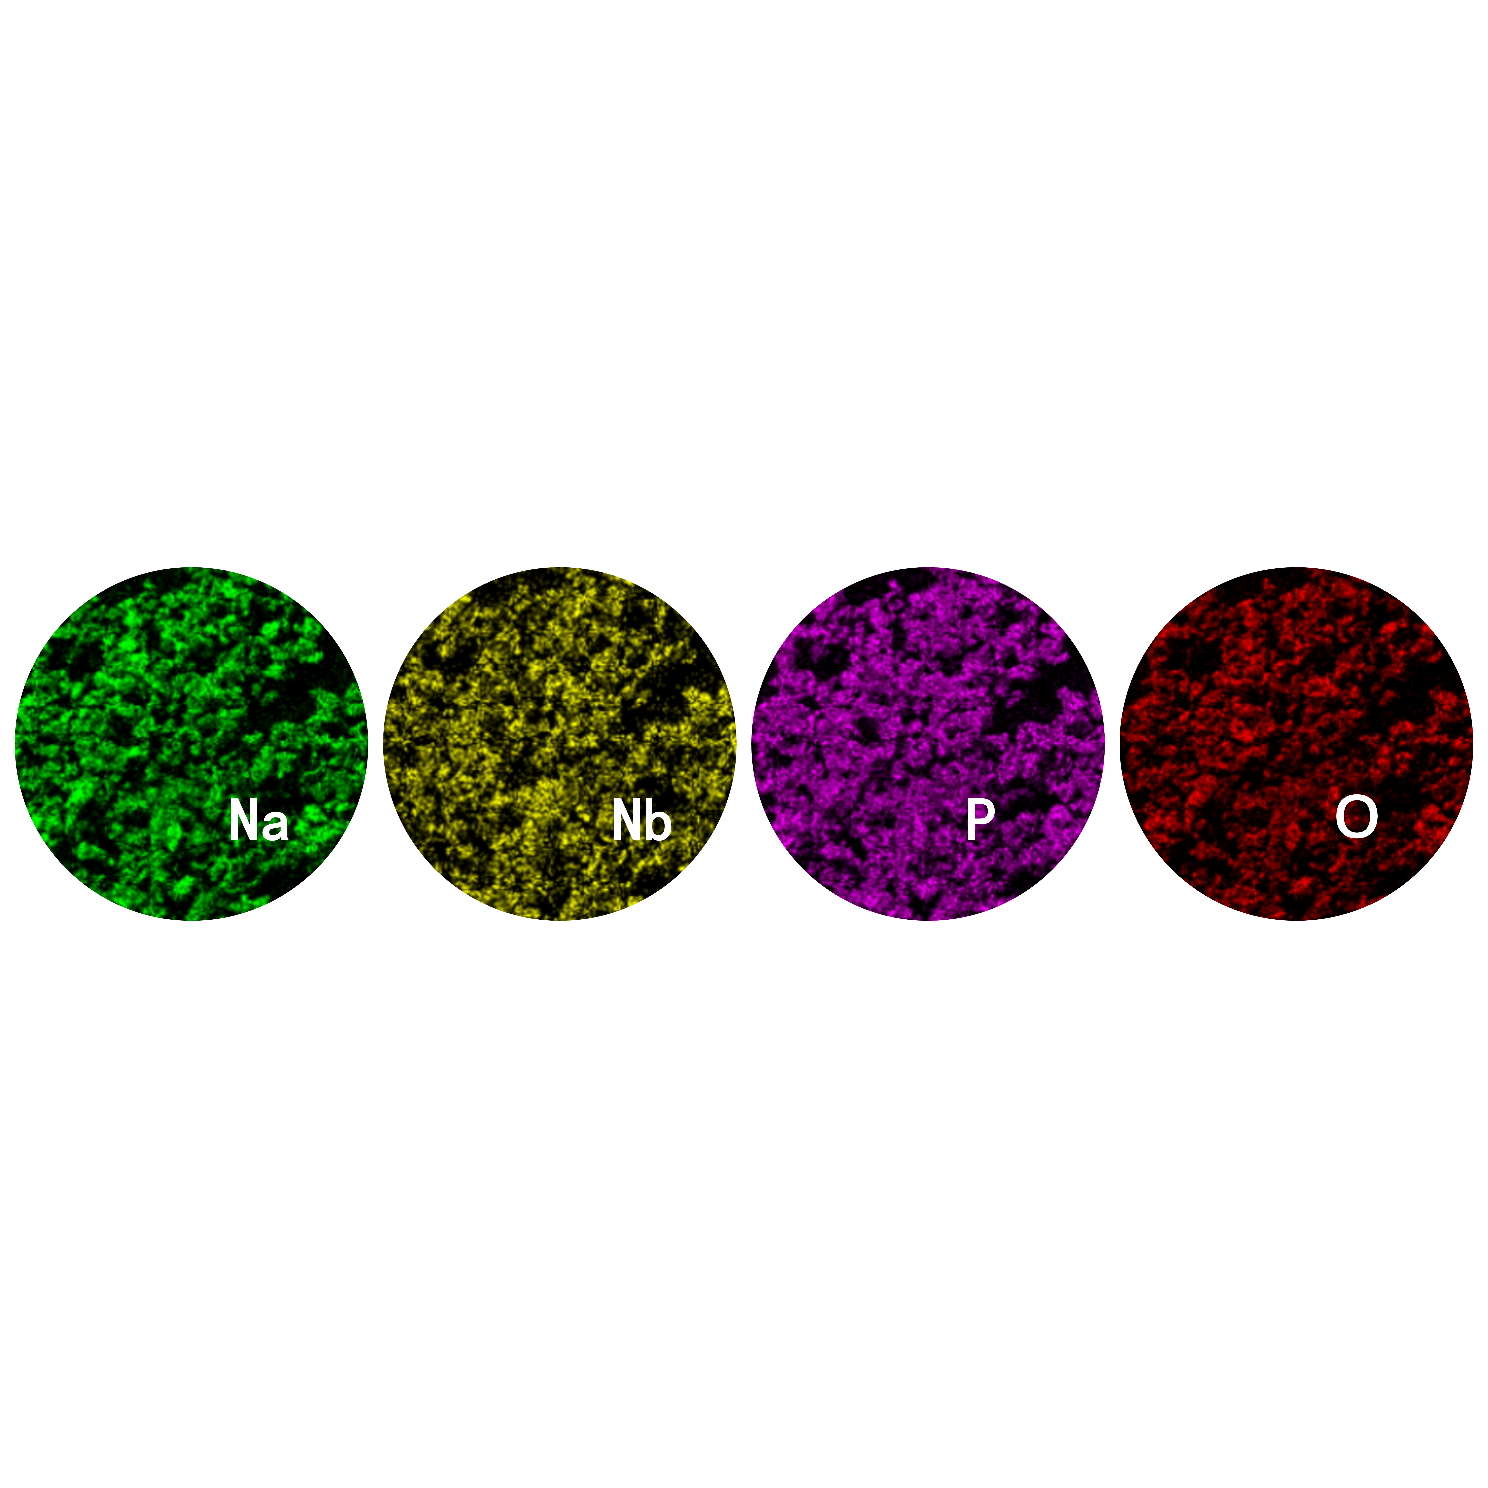


**Figure S5.** EDS experiments for the elements of Na12.


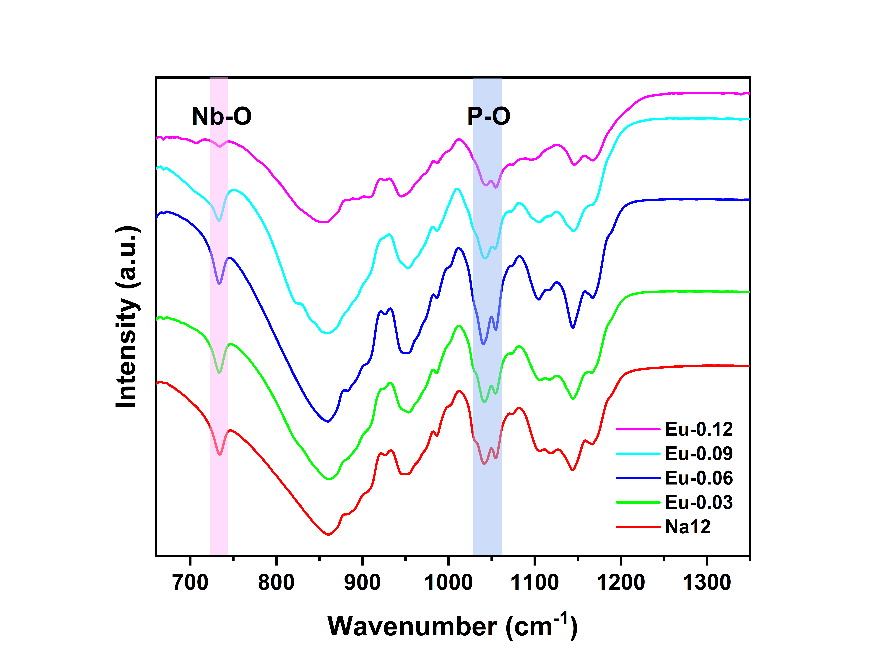


**Figure S6.** The FT-IR of Eu3+ with varying doping levels (from 0.03 to 0.12) are presented.





**Figure S7**. The cycle life of Eu-0.06 at 2000 mAh g-1


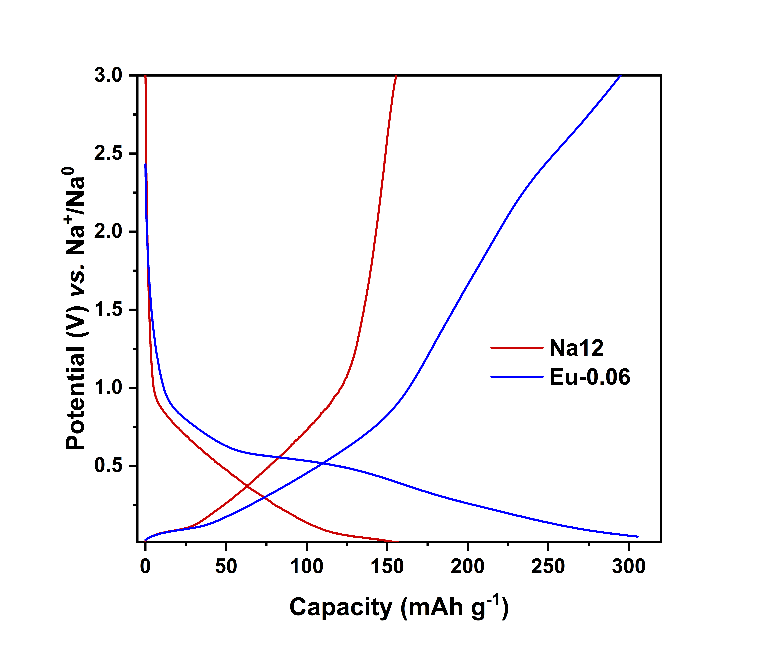


**Figure S8.** Charge/discharge curves at 50 mA g-1 of Na12 and Eu-0.06.





**Figure S9.** CV curves of Na12 at a scan rate of 0.1 mV/s between 0.01 and 3.0 V


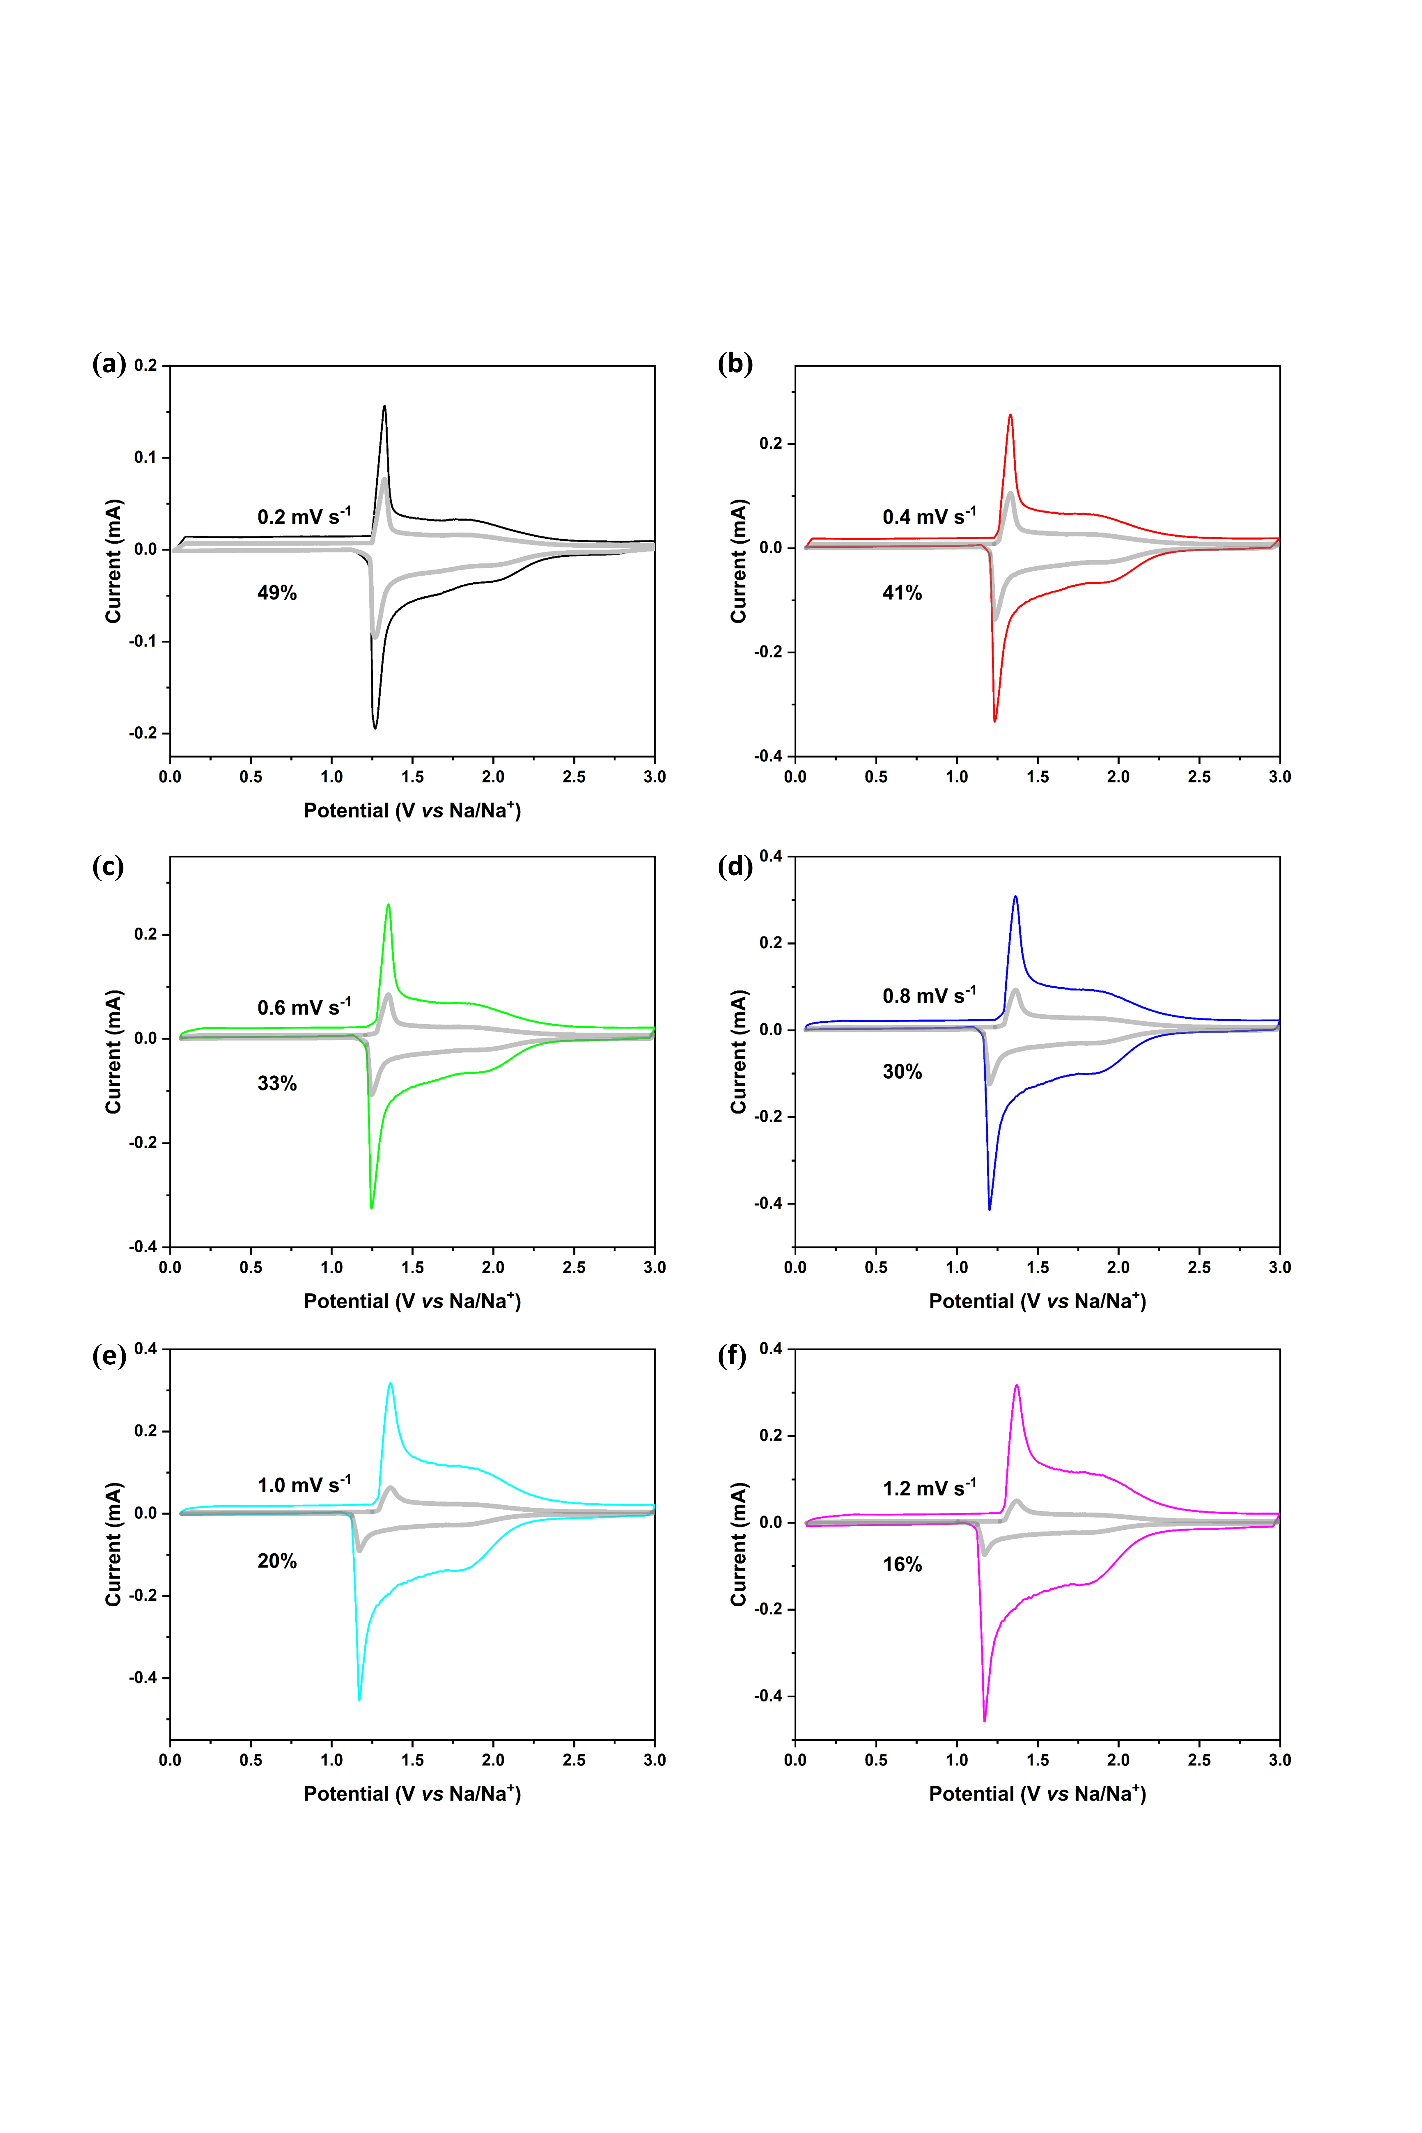


**Figure S10.** CV curves about diffusion control contributions at **a** 0.2 mV·s-1, b 0.4 mV·s-1, **c** 0.6 mV·s-1, **d** 0.8 mV·s-1, **e** 1.0 mV·s-1, **f** 1.2 mV·s-1.


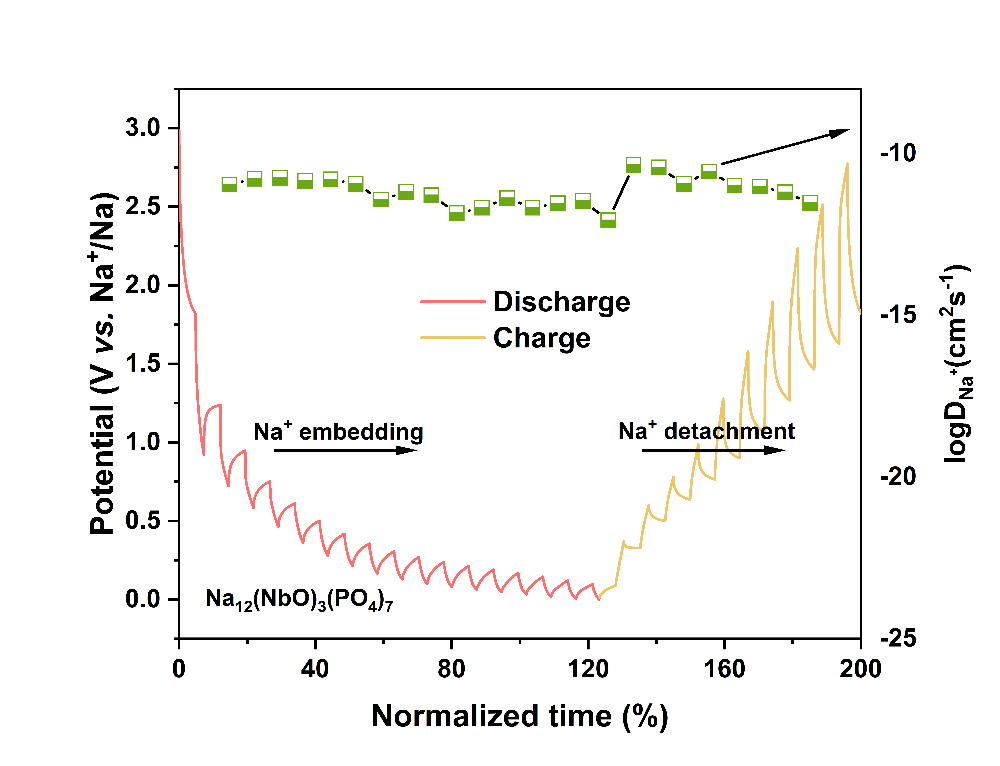


**Figure. S11** Sodium ions diffusion coefficients of Na12(NbO)3(PO4)7.

**Table S1.** Parameters of Na12(NbO)(3-x)Eux(PO4)7 by Rietveld Refinement

| **Samples** | **a** | **b** | **c** | **Volume (Å3)** | **Rwp** | **Rp** | **GOF** |
| --- | --- | --- | --- | --- | --- | --- | --- |
| **Na12** | 18.1661(9) | 21.1437(10) | 6.9515(3) | 2670.1(2) | 0.083 | 0.062 | 1.22 |
| **Eu-0.03** | 18.1862(6) | 21.1636(8) | 6.9600(3) | 2678.81(21) | 0.098 | 0.075 | 1.49 |

**Table S2.** Element ratios of Na12 and Eu-0.03 obtained from EDS measurements

|  | **Na12 (%)** | **Eu-0.06 (%)** |
| --- | --- | --- |
| **Na** | 22.64 | 22.67 |
| **Nb** | 5.66 | 5.55 |
| **P** | 13.21 | 13.22 |
| **O** | 58.49 | 58.44 |
| **Eu** | / | 0.12 |
| **Formula** | Na12(NbO)3(PO4)7 | Na12(NbO)2.94Eu0.06(PO4)7 |

**Table S3.** Comparison of electrochemical performance in this study with previously reported homologous electrode materials in SIBs.

| **Materials** | **Current density**  **(mA g-1)** | **Specific capacity**  **(mAh g-1)** | **Capacity retention**  **(cycles)** | **Ref.** |
| --- | --- | --- | --- | --- |
| Na12(NbO)2.94Eu0.06(PO4)7 | 2000 | 177.2 | 95.4% (2000) | This work |
| Na3.94Fe2.94V0.06(PO4)2P2O7 | 2528 | 99.6 | 81.7% (1000) | [S1] |
| Na4Fe2.7Mn0.3(PO4)2P2O7/rGO | 1290 | 79.6 | 97.2% (2000) | [S2] |
| Na3.3K0.2V1.5Mg0.5(PO4)2F3@NC | 2560 | 73.2 | 84.6 % (2000) | [S3] |
| Na3.05V1.95Mg0.05(PO4)3 | 1176 | 96.7 | 88.9% (180) | [S4] |
| NaTi2Gd0.05(PO4)2.95 | 665 | 63.4 | 75.0% (2000) | [S5] |
| Na3V1.98La0.02(PO4)3/C | 2340 | 70.35 | 93.5% (3000) | [S6] |

**Reference**

S1. Zhang H, Cao YJ, Liu ZL, Cheng XS, Li XL, Xu J, Wang N, Yang H, Liu Y, Zhang JX (2024) Structurally modulated Na4-*x*Fe3-*x*V*x*(PO4)2P2O7 by vanadium doping for long-life sodium-ion batteries. ACS Sustainable Chemistry & Engineering 12(13):5310-5318. <https://doi.org/10.1021/acssuschemeng.4c00387>.

S2. Li XQ, Zhang Y, Zhang BL, Qin K, Liu HM, Ma ZF (2022) Mn-doped Na4Fe3(PO4)2(P2O7) facilitating Na+ migration at low temperature as a high performance cathode material of sodium ion batteries. Journal of Power Sources 521:230922. <https://doi.org/10.1016/j.jpowsour.2021.230922>.

S3. Wang J, Liu QM, Cao SY, Zhu HJ, Wang YL (2024) Boosting sodium-ion battery performance with binary metal-doped Na3V2(PO4)2F3 cathodes. Journal of Colloid and Interface Science 665:1043-1053. <https://doi.org/10.1016/j.jcis.2024.04.003>.

S4. Li H, Tang H, Ma C, Bai Y, Alvarado J, Radhakrishnan B, Ong SP, Wua F, Meng YS, Wu C (2018) Understanding the electrochemical mechanisms induced by gradient Mg2+ distribution of Na-rich Na3+*x*V2-*x*Mg*x*(PO4)3/C for sodium ion batteries. Chemistry of Materials 30(8):2498-2505. <https://doi.org/10.1021/acs.chemmater.7b03903>.

S5. Xu GB, Chen Z, Liu X, Zhang Y, Wei XL, Yang LW, Chu PK (2019) Simultaneous texturing and conductivity tailoring of mesoporous NaTi2(PO4)3 nanocrystals by gadolinium doping for enhanced Na storage. Electrochimica Acta 309:177-186. <https://doi.org/10.1016/j.electacta.2019.04.059>.

S6. Bi LN, Li XY, Liu XQ, Zheng QJ, Lin DM (2019) Enhanced cycling stability and rate capability in a La-doped Na3V2(PO4)3/C cathode for high-performance sodium ion batteries. ACS Sustainable Chemistry & Engineering 7(8):7693-7699. <https://doi.org/10.1021/acssuschemeng.8b06385>.
